# Supplementary material
Source: ML conference proceedings conference paper supplement (https://aclanthology.org/D15-1194)
Supplement: Attachment [file D15-1194.Attachment.zip]

Pairs of Twitter phrases  
and SNOMED-CT terms

e.g. 'no sleep week' =  
'Insomnia', 'so  
unfocussed!!!' = 'Unable  
to concentrate'

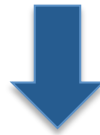

A Phrase-based MT  
Model

Using a phrase-based model  
(i.e. Equation (1)), such as  
Koehn et al. (2003)

e.g. 'No way I'm  
getting any sleep 2nite'

A Twitter  
Phrase

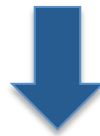

Our Mapping  
Approach

e.g.  
1. Insomnia (193462001)  
2. Productivity at work (224403006)

Using Equations (2), (3)  
or (4)

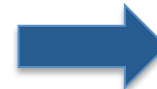

A ranking of  
mapped  
concepts
